# Supplementary material for: Enhancing the catalytic performance of PdAu catalysts by W-induced strong interaction for the direct synthesis of H2O2
Source: Royal Society of Chemistry journal article supplement (doi:10.1039/d2cy00112h), 2022-01-01
Supplement: d2cy00112h1.pdf [file d2cy00112h1.pdf]

## Enhancing catalytic performance of PdAu catalysts by W-induced strong interaction for the direct synthesis of H<sub>2</sub>O<sub>2</sub>

Meijia Zhang<sup>1#</sup>, Haoxiang Xu<sup>1#</sup>, Yibin Luo<sup>2</sup>, Jiqin Zhu<sup>1\*</sup> and Daojian Cheng<sup>1\*</sup>

<sup>1</sup>State Key Laboratory of Organic-Inorganic Composites, Beijing Key Laboratory of Energy Environmental Catalysis, Beijing University of Chemical Technology, Beijing 100029, People's Republic of China

<sup>2</sup>State Key Laboratory of Catalytic Materials and Reaction Engineering, RIPP, SINOPEC, Beijing 100083, People's Republic of China

\* Corresponding authors. E-mail addresses: [chengdj@mail.buct.edu.cn](mailto:chengdj@mail.buct.edu.cn) (D. Cheng), [zhujq@mail.buct.edu.cn](mailto:zhujq@mail.buct.edu.cn) (J. Zhu)

# These author contribute equally.

### Figure and table captions

**Figure S1.** TEM, HAADF-STEM and particle size distribution images of (a~c) PdAu/TiO<sub>2</sub>, (d~f) PdAu/WO<sub>3</sub>-TiO<sub>2</sub>, (g~i) WO<sub>3</sub>-PdAu/TiO<sub>2</sub> and (j~l) PdAuWO<sub>3</sub>/TiO<sub>2</sub>.

**Figure S2.** (a) HRTEM, (b) HAADF-STEM and (c~f) corresponding EDS mapping of PdAu/TiO<sub>2</sub>, (g~h) HAADF-STEM and corresponding EDS mapping of nanoparticle in PdAu/TiO<sub>2</sub>.

**Figure S3.** (a) HAADF-STEM, (b~d) corresponding EDS mapping images of WO<sub>3</sub>/TiO<sub>2</sub>.

**Figure S4.** (a) HRTEM, (b) HAADF-STEM and (c~g) corresponding EDS mapping images of WO<sub>3</sub>-PdAu/TiO<sub>2</sub>, (h) HAADF-STEM and (i) corresponding line-scan of nanoparticle in WO<sub>3</sub>-PdAu/TiO<sub>2</sub>.

**Figure S5.** (a) HRTEM, (b) HAADF-STEM, (c~g) corresponding EDS mapping images of PdAuWO<sub>3</sub>/TiO<sub>2</sub>, (h) HAADF-STEM and (i) corresponding line-scan of nanoparticle in PdAuWO<sub>3</sub>/TiO<sub>2</sub>.

**Figure S6.** Point scan data of nanoparticles in the catalysts.

**Figure S7.** XRD patterns of the catalysts.

**Figure S8.** Ti 2p XPS spectrums of PdAu/TiO<sub>2</sub> and TiO<sub>2</sub>.

**Figure S9.** (a) Pd 3d and (b) Au 4f XPS spectrums of PdAu/WO<sub>3</sub>-TiO<sub>2</sub> catalysts with different W content.

**Table S1.** The actual amount of Pd, Au and W loaded on the catalysts.

**Table S2.** List of catalysts for the direct synthesis of H<sub>2</sub>O<sub>2</sub> in previous literatures.

**Table S3.** The mass ratio of Pd, Au and W in the catalysts measured by XPS and ICP.

**Table S4.** Surface Pd<sup>0</sup> and Pd<sup>2+</sup> percent of PdAu/WO<sub>3</sub>-TiO<sub>2</sub> catalysts with different W content.

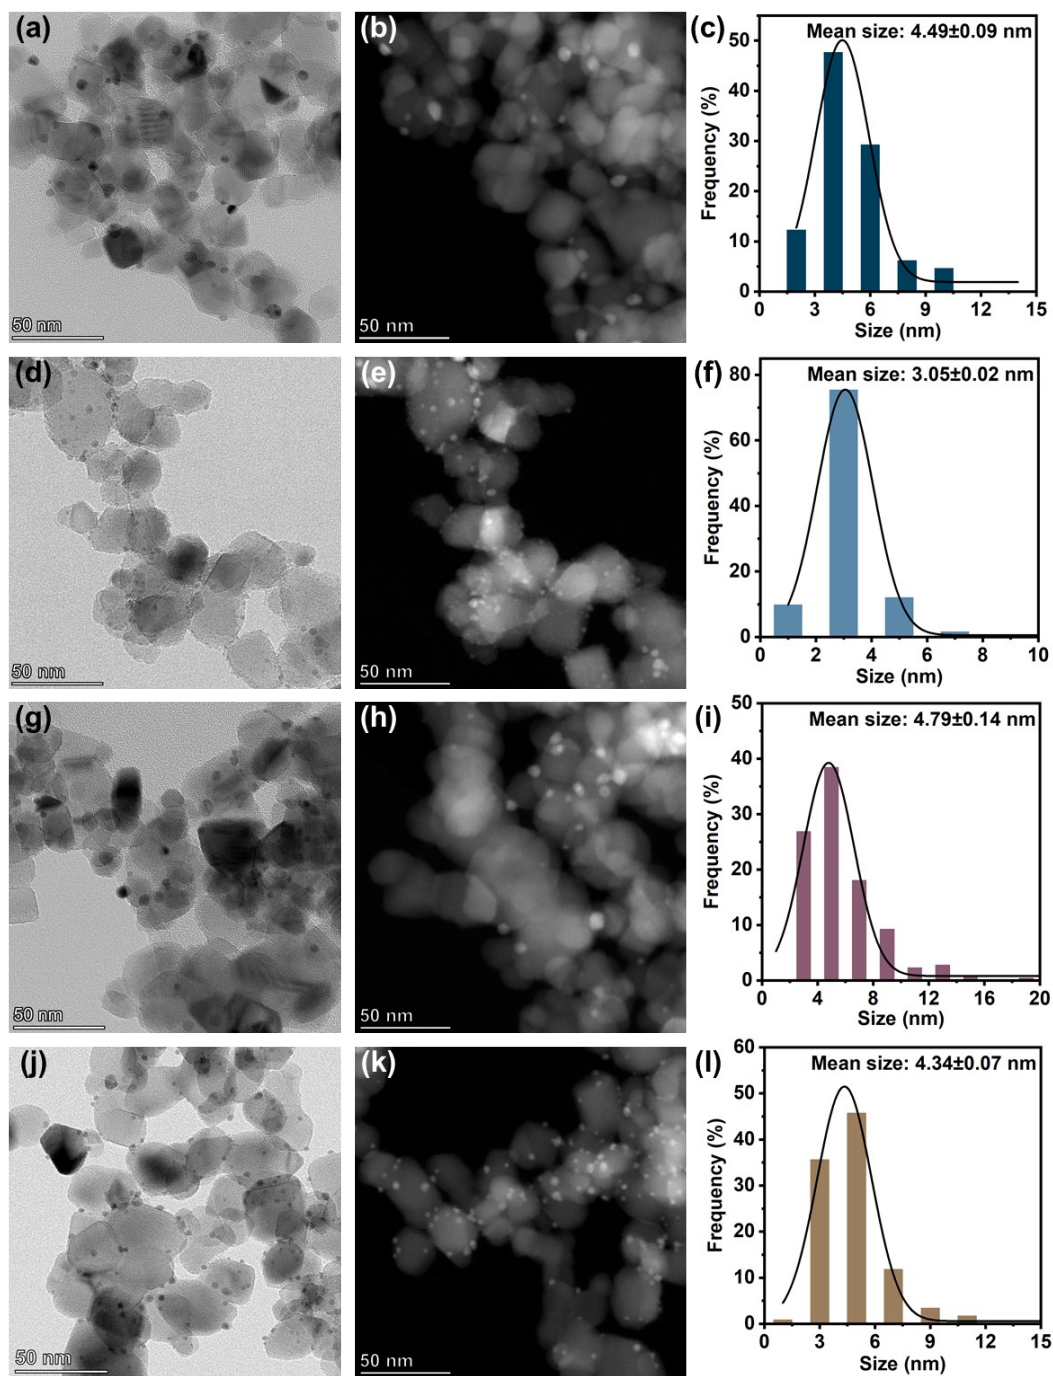

**Figure S1.** TEM, HAADF-STEM and particle size distribution images of (a~c) PdAu/TiO<sub>2</sub>, (d~f) PdAu/WO<sub>3</sub>-TiO<sub>2</sub>, (g~i) WO<sub>3</sub>-PdAu/TiO<sub>2</sub> and (j~l) PdAuWO<sub>3</sub>/TiO<sub>2</sub>.

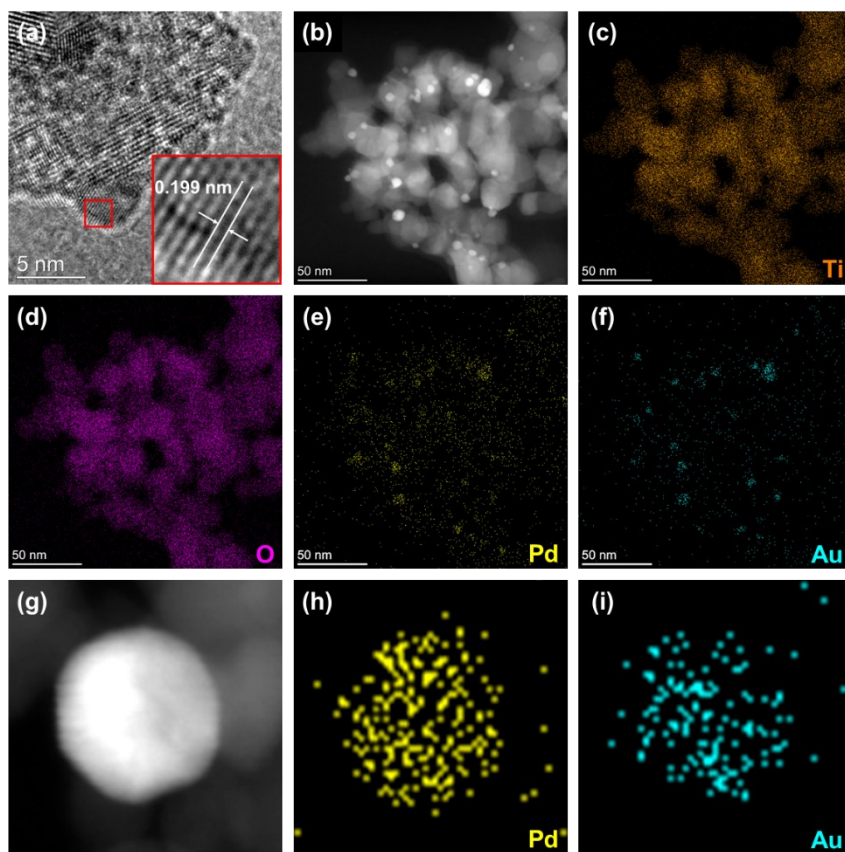

**Figure S2.** (a) HRTEM, (b) HAADF-STEM and (c~f) corresponding EDS mapping of PdAu/TiO<sub>2</sub>, (g~h) HAADF-STEM and corresponding EDS mapping of nanoparticle in PdAu/TiO<sub>2</sub>.

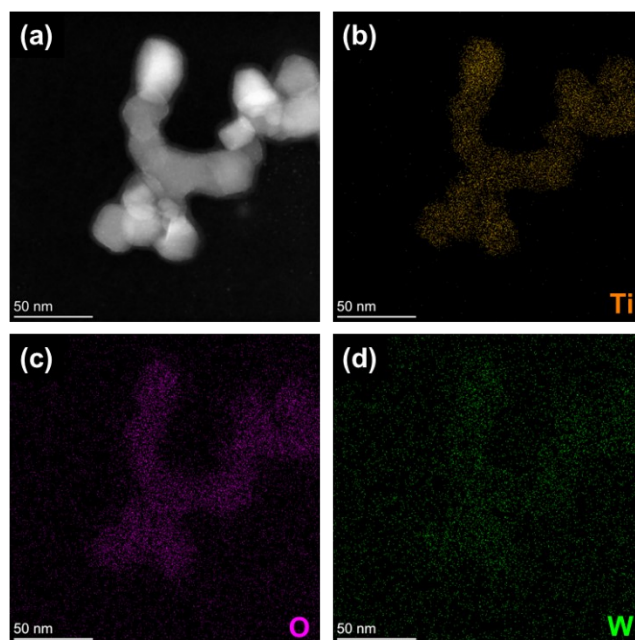

**Figure S3.** (a) HAADF-STEM, (b~d) corresponding EDS mapping images of  $\text{WO}_3/\text{TiO}_2$ .

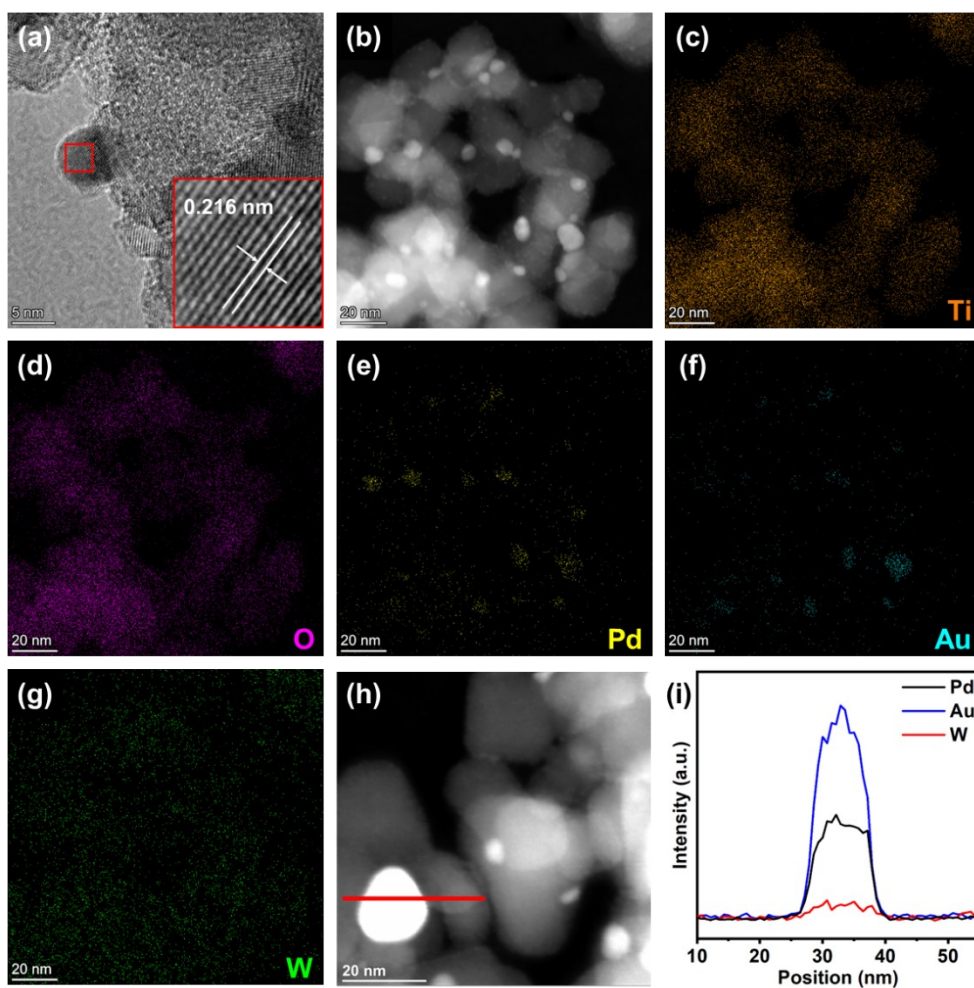

**Figure S4.** (a) HRTEM, (b) HAADF-STEM and (c~g) corresponding EDS mapping images of  $\text{WO}_3\text{-PdAu/TiO}_2$ , (h) HAADF-STEM and (i) corresponding line-scan of nanoparticle in  $\text{WO}_3\text{-PdAu/TiO}_2$ .



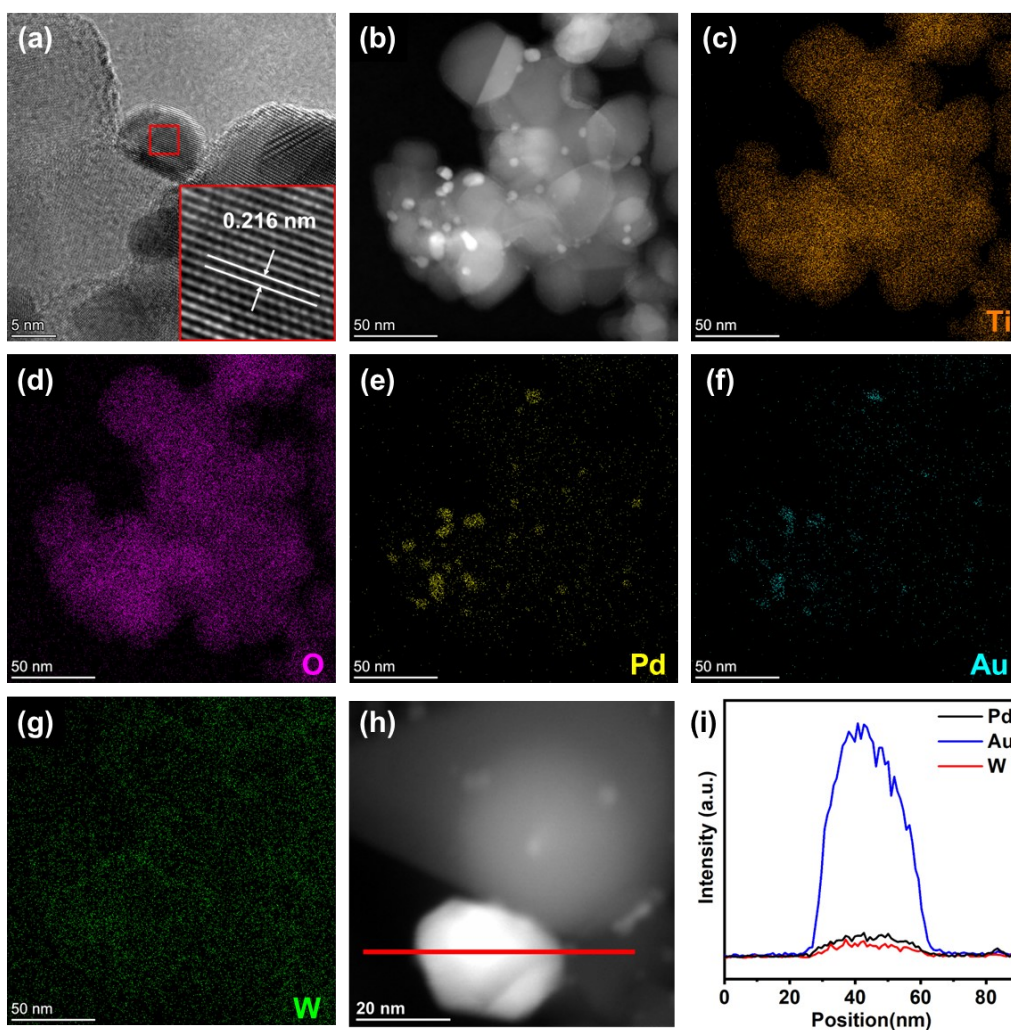

**Figure S5.** (a) HRTEM, (b) HAADF-STEM and (c~g) corresponding EDS mapping images of PdAuWO<sub>3</sub>/TiO<sub>2</sub>, (h) HAADF-STEM and (i) corresponding line-scan of nanoparticle in PdAuWO<sub>3</sub>/TiO<sub>2</sub>.

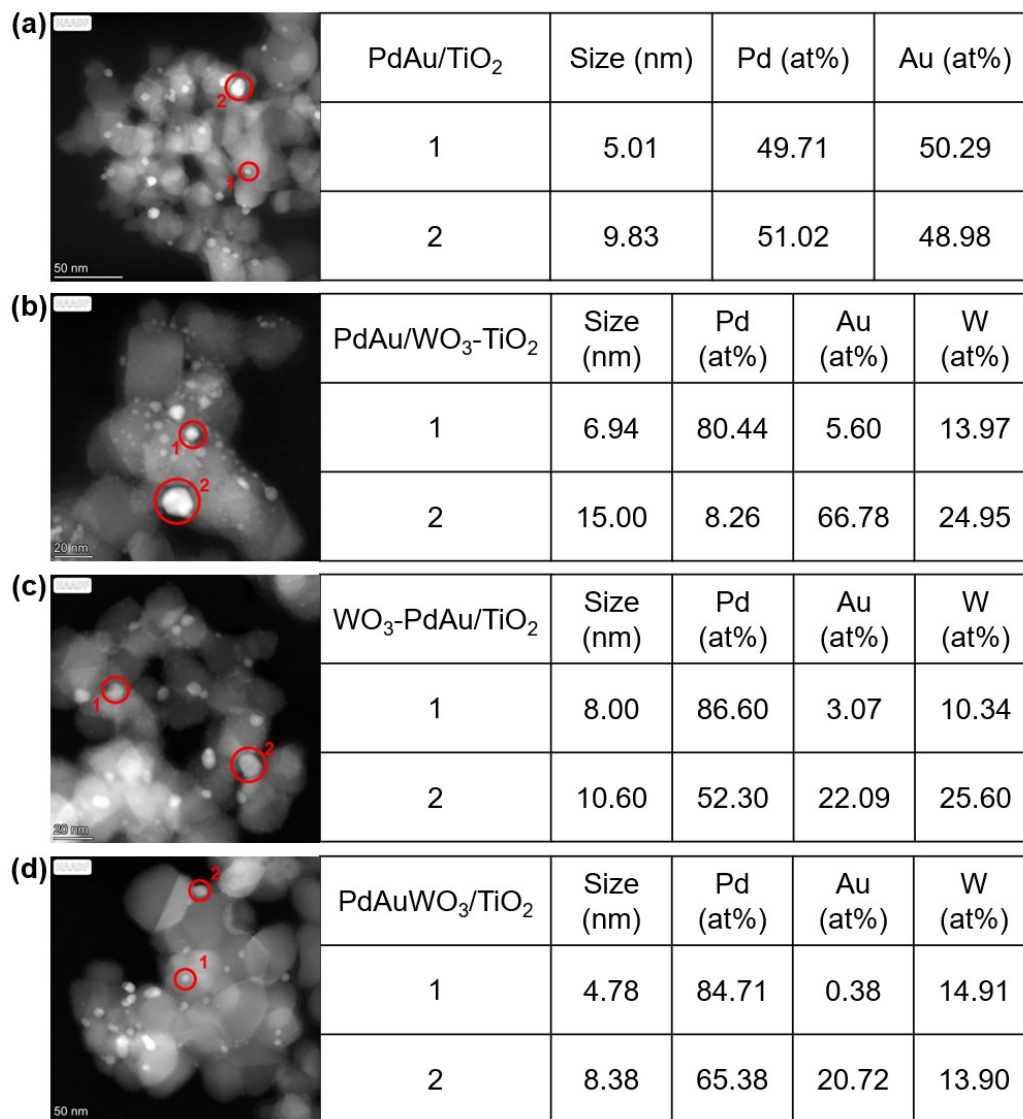

**Figure S6.** Point scan data of nanoparticles in the catalysts.



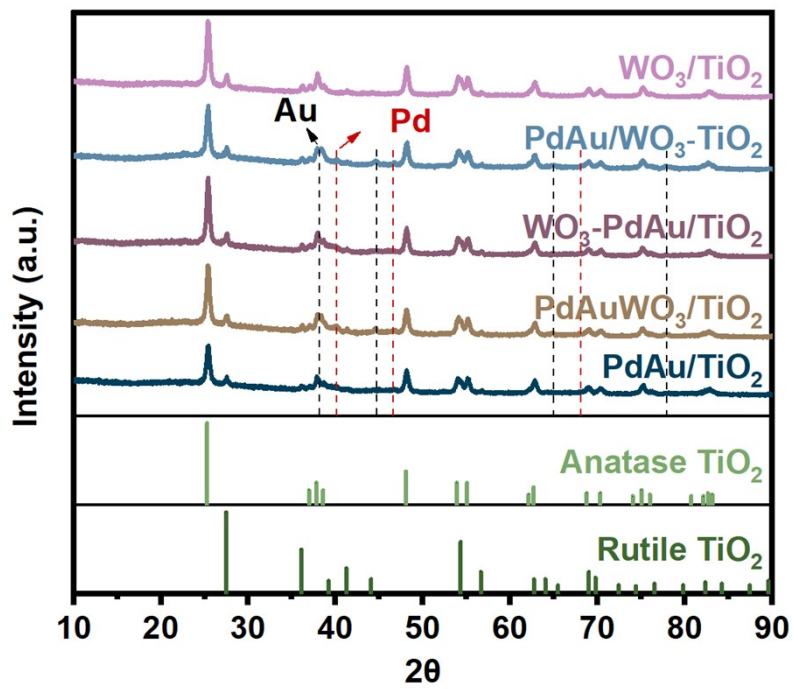

**Figure S7.** XRD patterns of the catalysts.

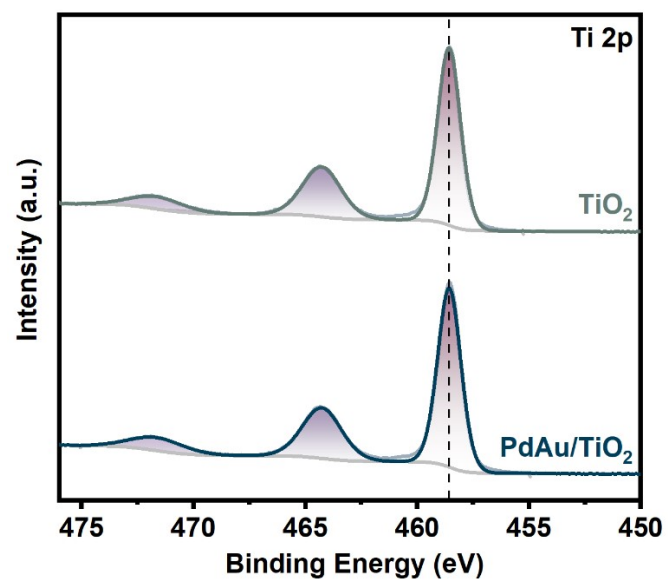

**Figure S8.** Ti 2p XPS spectrums of PdAu/TiO<sub>2</sub> and TiO<sub>2</sub>.

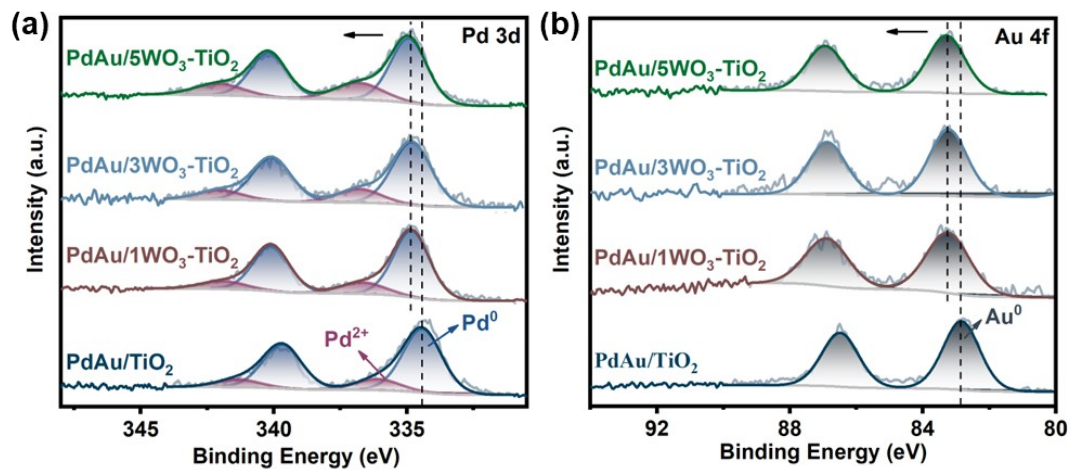

**Figure S9.** (a) Pd 3d and (b) Au 4f XPS spectra of PdAu/WO<sub>3</sub>-TiO<sub>2</sub> catalysts with different W content.

**Table S1.** The actual amount of Pd, Au and W loaded on the catalysts.

| Catalyst                                    | Pd (wt%) | Au (wt%) | W (wt%) |
|---------------------------------------------|----------|----------|---------|
| PdAu/TiO <sub>2</sub>                       | 2.7      | 2.8      | —       |
| PdAuWO <sub>3</sub> /TiO <sub>2</sub> (3W)  | 2.7      | 2.8      | 3.3     |
| WO <sub>3</sub> -PdAu/TiO <sub>2</sub> (3W) | 2.6      | 2.6      | 3.2     |
| PdAu/WO <sub>3</sub> -TiO <sub>2</sub> (3W) | 2.7      | 2.9      | 3.1     |
| WO <sub>3</sub> /TiO <sub>2</sub>           | —        | —        | 3.2     |
| PdAu/1WO <sub>3</sub> -TiO <sub>2</sub>     | 2.8      | 2.8      | 1.1     |
| PdAu/2WO <sub>3</sub> -TiO <sub>2</sub>     | 2.8      | 2.7      | 1.8     |
| PdAu/4WO <sub>3</sub> -TiO <sub>2</sub>     | 2.8      | 2.7      | 3.5     |
| PdAu/5WO <sub>3</sub> -TiO <sub>2</sub>     | 2.8      | 2.8      | 5.0     |
| PdAu/SiO <sub>2</sub>                       | 3.0      | 3.2      | —       |
| PdAu/WO <sub>3</sub> -SiO <sub>2</sub> (3W) | 3.0      | 3.1      | 3.2     |

**Table S2.** List of catalysts for the direct synthesis of H<sub>2</sub>O<sub>2</sub> in previous literatures.

| Reaction Catalyst                                         | Additive                            | Reaction             |             | Reaction          |                                                    | Productivity<br>(mol <sub>H<sub>2</sub>O<sub>2</sub></sub> kg <sub>c</sub><br>at <sup>-1</sup> h <sup>-1</sup> ) | Selectivity<br>(%) |
|-----------------------------------------------------------|-------------------------------------|----------------------|-------------|-------------------|----------------------------------------------------|------------------------------------------------------------------------------------------------------------------|--------------------|
|                                                           |                                     | Temperatur<br>e (°C) | Time (h)    | Pressure<br>(MPa) | Solvent                                            |                                                                                                                  |                    |
| <b>PdAu/WO<sub>3</sub>-TiO<sub>2</sub> (In this work)</b> | <b>H<sub>2</sub>SO<sub>4</sub></b>  | <b>2</b>             | <b>0.25</b> | <b>4</b>          | <b>CH<sub>3</sub>OH+H<sub>2</sub>O</b>             | <b>662.6</b>                                                                                                     | <b>85.5</b>        |
| W-Pd/Al <sub>2</sub> O <sub>3</sub> <sup>1</sup>          | H <sub>2</sub> SO <sub>4</sub>      | 2                    | 0.25        | 4                 | CH <sub>3</sub> OH+H <sub>2</sub> O                | 125.3                                                                                                            | 59.1               |
| Pd <sub>6</sub> Pb/TiO <sub>2</sub> <sup>2</sup>          | /                                   | 0                    | 0.5         | 4                 | CH <sub>3</sub> OH+H <sub>2</sub> O                | 170.1                                                                                                            | 56.7               |
| Pd <sub>3</sub> Pb cubes/s-TiO <sub>2</sub> <sup>3</sup>  | /                                   | 30                   | 1           | 4                 | C <sub>2</sub> H <sub>5</sub> OH                   | 222.4                                                                                                            | 53                 |
| R-PdNi/TiO <sub>2</sub> -C <sup>4</sup>                   | /                                   | 25                   | 1.5         | 0.1               | H <sub>2</sub> O                                   | 83.3                                                                                                             | 96.15              |
| PdAu@HZSM-5 <sup>5</sup>                                  |                                     | 2                    | 0.5         | 4                 | CH <sub>3</sub> OH+H <sub>2</sub> O                | 27.73                                                                                                            | 90                 |
| Au-Pd/TiO <sub>2</sub> <sup>6</sup>                       | CO <sub>2</sub>                     | 2                    | 0.5         | 4                 | CH <sub>3</sub> OH+H <sub>2</sub> O                | 93                                                                                                               | 44                 |
| Au-Pd-G6%T <sup>7</sup>                                   | H <sub>2</sub> SO <sub>4</sub>      | 5                    | 1           | 4                 | CH <sub>3</sub> OH                                 | 55                                                                                                               | 64                 |
| PdTe/Al <sub>2</sub> O <sub>3</sub> <sup>8</sup>          | H <sub>2</sub> SO <sub>4</sub>      | 10                   | 1/6         | 0.1               | C <sub>2</sub> H <sub>5</sub> OH                   | 84.7                                                                                                             | 52.9               |
| AuPdPt/TiO <sub>2</sub> <sup>9</sup>                      | /                                   | 2                    | 0.5         | 4                 | CH <sub>3</sub> OH+H <sub>2</sub> O                | 112                                                                                                              | 37                 |
| Pd@NiO <sub>3</sub> /TiO <sub>2</sub> <sup>10</sup>       | /                                   | 2                    | 0.5         | 4                 | CH <sub>3</sub> OH+H <sub>2</sub> O                | 89                                                                                                               | 81                 |
| Pd-Sb/TiO <sub>2</sub> <sup>11</sup>                      | H <sub>2</sub> SO <sub>4</sub>      | 10                   | 1/6         | 0.1               | C <sub>2</sub> H <sub>5</sub> OH                   | 46.6                                                                                                             | 73                 |
| Pd-Zn/ Al <sub>2</sub> O <sub>3</sub> <sup>12</sup>       | H <sub>2</sub> SO <sub>4</sub>      | 2                    | 0.25        | 3                 | CH <sub>3</sub> OH                                 | 216.2                                                                                                            | 78.5               |
| Pd/HAp <sup>13</sup>                                      | H <sub>2</sub> SO <sub>4</sub>      | 10                   | 0.5         |                   | C <sub>2</sub> H <sub>5</sub> OH                   | 37.1                                                                                                             | 43                 |
| AuPd/2LbL <sup>14</sup>                                   | NaBr+H <sub>2</sub> SO <sub>4</sub> | 42                   | 3           | 2                 | C <sub>2</sub> H <sub>3</sub> N+H <sub>2</sub> O   | 210                                                                                                              | 67                 |
| Pd-Te/TiO <sub>2</sub> <sup>15</sup>                      | H <sub>2</sub> SO <sub>4</sub>      | 10                   | 1/6         | 0.1               | CH <sub>3</sub> OH                                 | 29.3                                                                                                             | ~100               |
| Pd-Ag/SiO <sub>2</sub> <sup>16</sup>                      | H <sub>2</sub> SO <sub>4</sub>      | 2                    | 0.25        | 3                 | CH <sub>3</sub> OH                                 | 58.3                                                                                                             | 70.9               |
| 3 wt% Pd-2 wt% Sn/TiO <sub>2</sub> <sup>17</sup>          | /                                   | 2                    | 0.5         | 4                 | CH <sub>3</sub> OH+H <sub>2</sub> O                | 61                                                                                                               | 96                 |
| Pd/SiO <sub>2</sub> <sup>18</sup>                         | KBr+ H <sub>2</sub> PO <sub>4</sub> | 20                   | 3           | 0.1               | C <sub>2</sub> H <sub>5</sub> OH+H <sub>2</sub> O  | 4.77                                                                                                             | 62                 |
| Pd/N-TiO <sub>2</sub> <sup>19</sup>                       | H <sub>2</sub> SO <sub>4</sub>      | 10                   | 2           | 0.1               | C <sub>2</sub> H <sub>5</sub> OH                   | 41                                                                                                               | 58.8               |
| Pd/HNb <sub>3</sub> O <sub>8</sub> -NS <sup>20</sup>      | /                                   | 20                   | 4           | 0.2               | CH <sub>3</sub> OH                                 | 2.3                                                                                                              | 16                 |
| Pd/TiO <sub>2</sub> <sup>21</sup>                         | H <sub>2</sub> SO <sub>4</sub>      | 10                   | 0.5         | 0.1               | CH <sub>3</sub> OH                                 | 29.9                                                                                                             | 61                 |
| Pd/C <sup>22</sup>                                        | HCl                                 | 10                   | 4           | /                 | C <sub>2</sub> H <sub>5</sub> OH+ H <sub>2</sub> O | 134.9                                                                                                            | 74                 |



|                                      |                                |    |     |     |                                     |      |      |
|--------------------------------------|--------------------------------|----|-----|-----|-------------------------------------|------|------|
| PdAu/TiO <sub>2</sub> <sup>23</sup>  | H <sub>2</sub> SO <sub>4</sub> | 10 | 1/6 | 0.1 | C <sub>2</sub> H <sub>5</sub> OH    | 69.9 | 48.1 |
| Pd/PAH-K2621 <sup>24</sup>           | HBr                            | 30 | 3   | 5   | CH <sub>3</sub> OH                  | 12.7 | 73   |
| Pd/C <sup>25</sup>                   | H <sub>2</sub> SO <sub>4</sub> | 20 | 4   | 2.1 | H <sub>2</sub> O                    | 170  | 59.4 |
| Au-Pd/C <sup>26</sup>                | /                              | 2  | 0.5 | 4   | CH <sub>3</sub> OH+H <sub>2</sub> O | 110  | 80   |
| Pd-Au/ZrO <sub>2</sub> <sup>27</sup> | H <sub>2</sub> SO <sub>4</sub> | 20 | 5   | 0.1 | CH <sub>3</sub> OH                  | 16.7 | 52   |

Table S3. The mass ratio of Pd, Au and W in the catalysts measured by XPS and ICP.

| Catalysts                                   | Measurement method | Pd (wt%) | Au (wt%) | W (wt%) |
|---------------------------------------------|--------------------|----------|----------|---------|
| PdAu/TiO <sub>2</sub>                       | XPS                | 44.72    | 55.28    | —       |
|                                             | ICP                | 48.9     | 51.1     | —       |
| PdAuWO <sub>3</sub> /TiO <sub>2</sub> (3W)  | XPS                | 5.97     | 4.43     | 89.6    |
|                                             | ICP                | 30.7     | 31.7     | 37.6    |
| WO <sub>3</sub> -PdAu/TiO <sub>2</sub> (3W) | XPS                | 11.54    | 11.33    | 77.13   |
|                                             | ICP                | 30.4     | 31.3     | 38.3    |
| PdAu/WO <sub>3</sub> -TiO <sub>2</sub> (3W) | XPS                | 7.82     | 6.54     | 85.63   |
|                                             | ICP                | 31.6     | 33.2     | 35.2    |
| PdAu/SiO <sub>2</sub>                       | XPS                | 47.83    | 52.17    | —       |
|                                             | ICP                | 49.0     | 51.0     | —       |
| PdAu/WO <sub>3</sub> -SiO <sub>2</sub> (3W) | XPS                | 30.72    | 32.16    | 37.13   |
|                                             | ICP                | 32.2     | 33.4     | 34.4    |

**Table S4.** Surface Pd<sup>0</sup> and Pd<sup>2+</sup> percent of PdAu/WO<sub>3</sub>-TiO<sub>2</sub> catalysts with different W content.

| Catalyst                                | Pd <sup>0</sup> (%) | Pd <sup>2+</sup> (%) |
|-----------------------------------------|---------------------|----------------------|
| PdAu/1WO <sub>3</sub> -TiO <sub>2</sub> | 82.46               | 17.54                |
| PdAu/3WO <sub>3</sub> -TiO <sub>2</sub> | 80.53               | 19.47                |
| PdAu/5WO <sub>3</sub> -TiO <sub>2</sub> | 74.69               | 25.31                |

## References

1. Zhang M, Luo Y, Wu D, Li Q, Xu H, Cheng D. Promoter role of tungsten in W-Pd/Al<sub>2</sub>O<sub>3</sub> catalyst for direct synthesis of H<sub>2</sub>O<sub>2</sub>: Modification of Pd/PdO ratio. *Applied Catalysis A: General*. 2021;628:118392.
2. Cao K, Yang H, Bai S, Xu Y, Yang C, Wu Y, Xie M, Cheng T, Shao Q, Huang X. Efficient Direct H<sub>2</sub>O<sub>2</sub> Synthesis Enabled by PdPb Nanorings via Inhibiting the O-O Bond Cleavage in O<sub>2</sub> and H<sub>2</sub>O<sub>2</sub>. *ACS Catalysis*. 2021;11(3):1106-1118.
3. Naina VR, Wang S, Sharapa DI, Zimmermann M, Hähsler M, Niebl-Eibenstein L, Wang J, Wöll C, Wang Y, Singh SK, Studt F, Behrens S. Shape-Selective Synthesis of Intermetallic Pd<sub>3</sub>Pb Nanocrystals and Enhanced Catalytic Properties in the Direct Synthesis of Hydrogen Peroxide. *ACS Catalysis*. 2021;11(4):2288-2301.
4. Huynh T-T, Huang W-H, Tsai M-C, Nugraha M, Haw S-C, Lee J-F, Su W-N, Hwang BJ. Synergistic Hybrid Support Comprising TiO<sub>2</sub>-Carbon and Ordered PdNi Alloy for Direct Hydrogen Peroxide Synthesis. *ACS Catal*. 2021;11(14):8407-8416.
5. Jin Z, Liu Y, Wang L, Wang C, Wu Z, Zhu Q, Wang L, Xiao F-S. Direct Synthesis of Pure Aqueous H<sub>2</sub>O<sub>2</sub> Solution within Aluminosilicate Zeolite Crystals. *ACS Catalysis*. 2021;11(4):1946-1951.
6. Santos A, Lewis RJ, Malta G, Howe AGR, Morgan DJ, Hampton E, Gaskin P, Hutchings GJ. Direct synthesis of hydrogen peroxide over Au-Pd supported nanoparticles under ambient conditions. *Industrial & Engineering Chemistry Research*. 2019;58(28):12623-12631.
7. Guo S, Zhang S, Fang Q, Abroshan H, Kim HJ, Haruta M, Li G. Gold-Palladium Nanoalloys Supported by Graphene Oxide and Lamellar TiO<sub>2</sub> for Direct Synthesis of Hydrogen Peroxide. *ACS Applied Materials & Interfaces*. 2018;10(47):40599-40607.
8. Tian P, Xuan F, Ding D, Sun Y, Xu X, Li W, Si R, Xu J, Han Y-F. Revealing the role of tellurium in palladium-tellurium catalysts for the direct synthesis of hydrogen peroxide. *Journal of Catalysis*. 2020;385:21-29.
9. Gong X, Lewis RJ, Zhou S, Morgan DJ, Davies TE, Liu X, Kiely CJ, Zong B, Hutchings GJ. Enhanced catalyst selectivity in the direct synthesis of H<sub>2</sub>O<sub>2</sub> through Pt incorporation into TiO<sub>2</sub> supported AuPd catalysts. *Catalysis Science & Technology*. 2020;10(14):4635-4644.
10. Feng Y, Shao Q, Huang B, Zhang J, Huang X. Surface engineering at the interface of core/shell nanoparticles promotes hydrogen peroxide generation. *National Science Review*. 2018;5(6):895-906.
11. Ding D, Xu X, Tian P, Liu X, Xu J, Han Y-F. Promotional effects of Sb on Pd-based catalysts for the direct synthesis of hydrogen peroxide at ambient pressure. *Chinese Journal of Catalysis*. 2018;39(4):673-681.
12. Wang S, Gao K, Li W, Zhang J. Effect of Zn addition on the direct synthesis of hydrogen peroxide over supported palladium catalysts. *Applied Catalysis A: General*. 2017;531:89-95.
13. Tian P, Ouyang L, Xu X, Ao C, Xu X, Si R, Shen X, Lin M, Xu J, Han Y-F. The origin of palladium particle size effects in the direct synthesis of H<sub>2</sub>O<sub>2</sub>: Is smaller

- better? *Journal of Catalysis*. 2017;349:30-40.
14. Kanungo S, Paunovic V, Schouten JC, Neira D'Angelo MF. Facile Synthesis of Catalytic AuPd Nanoparticles within Capillary Microreactors Using Polyelectrolyte Multilayers for the Direct Synthesis of H<sub>2</sub>O<sub>2</sub>. *Nano Letters*. 2017;17(10):6481-6486.
  15. Tian P, Xu X, Ao C, Ding D, Li W, Si R, Tu W, Xu J, Han YF. Direct and selective synthesis of hydrogen peroxide over palladium-tellurium catalysts at ambient pressure. *ChemSusChem*. 2017;10(17):3342-3346.
  16. Gu J, Wang S, He Z, Han Y, Zhang J. Direct Synthesis of Hydrogen Peroxide from Hydrogen and Oxygen over Activated Carbon-Supported Pd-Ag Alloy Catalysts. *Catal Sci Technol*. 2016;6(3):809-817.
  17. Freakley SJ, He Q, Harrhy JH, Lu L, Crole DA, Morgan DJ, Ntainjua EN, Edwards JK, Carley AF, Borisevich AY, Kiely CJ, Hutchings GJ. Palladium-Tin Catalysts for the Direct Synthesis of H<sub>2</sub>O<sub>2</sub> with High Selectivity. *Science*. 2016;351(6276):965-968.
  18. Jeong HE, Kim S, Seo M-g, Lee D-W, Lee K-Y. Catalytic Activity of Pd Octahedrons/SiO<sub>2</sub> for the Direct Synthesis of Hydrogen Peroxide from Hydrogen and Oxygen. *J Mol Catal A: Chem*. 2016;420:88-95.
  19. Ao C, Tian P, Ouyang L, Da G, Xu X, Xu J, Han Y-F. Dispersing Pd nanoparticles on N-doped TiO<sub>2</sub>: a highly selective catalyst for H<sub>2</sub>O<sub>2</sub> synthesis. *Catalysis Science & Technology*. 2016;6(13):5060-5068.
  20. Lee N, Chung Y-M. Direct Synthesis of Hydrogen Peroxide from Hydrogen and Oxygen over Pd-Supported HNb<sub>3</sub>O<sub>8</sub> Metal Oxide Nanosheet Catalyst. *Res Chem Intermed*. 2016;42(1):95-108.
  21. Ouyang L, Tian P, Da G, Xu X, Ao C, Chen T, Si R, Xu J, Han Y. The Origin of Active Sites for Direct Synthesis of H<sub>2</sub>O<sub>2</sub> on Pd/TiO<sub>2</sub> Catalysts: Interfaces of Pd and PdO Domains. *J Catal*. 2015;321:70-80.
  22. Hu B, Deng W, Li R, Zhang Q, Wang Y, Delplanque-Janssens F, Paul D, Desmedt F, Miquel P. Carbon-supported palladium catalysts for the direct synthesis of hydrogen peroxide from hydrogen and oxygen. *Journal of Catalysis*. 2014;319:15-26.
  23. Ouyang L, Da G-j, Tian P-f, Chen T-y, Liang G-d, Xu J, Han Y-F. Insight into active sites of Pd-Au/TiO<sub>2</sub> catalysts in hydrogen peroxide synthesis directly from H<sub>2</sub> and O<sub>2</sub>. *Journal of Catalysis*. 2014;311:129-136.
  24. Kim J, Chung Y-M, Kang S-M, Choi C-H, Kim B-Y, Kwon Y-T, Kim TJ, Oh S-H, Lee C-S. Palladium Nanocatalysts Immobilized on Functionalized Resin for the Direct Synthesis of Hydrogen Peroxide from Hydrogen and Oxygen. *ACS Catalysis*. 2012;2(6):1042-1048.
  25. Inoue T, Kikutani Y, Hamakawa S, Mawatari K, Mizukami F, Kitamori T. Reactor design optimization for direct synthesis of hydrogen peroxide. *Chemical Engineering Journal*. 2010;160(3):909-914.
  26. Edwards JK, Solsona B, Ntainjua N E, Carley AF, Herzing AA, Kiely CJ, Hutchings GJ. Switching Off Hydrogen Peroxide Hydrogenation in the Direct Synthesis Process. *Science*. 2009;323:1037-1041.



27. Menegazzo F, Signoretto M, Manzoli M, Boccuzzi F, Cruciani G, Pinna F, Strukul G. Influence of the Preparation Method on the Morphological and Composition Properties of Pd-Au/ZrO<sub>2</sub> Catalysts and Their Effect on the Direct Synthesis of Hydrogen Peroxide from Hydrogen and Oxygen. *J Catal.* 2009;268(1):122-130.
